# Supplementary material
Source: PubMed Central journal article supplement (PMC11389429)
Supplement: SC-015-D4SC03290J-s001.pdf [file SC-015-D4SC03290J-s001.pdf]

## **( $\eta^8$ -Cyclooctatetraene)( $\eta^5$ -fluorenyl)titanium: a processable molecular spin qubit with optimized control of the molecule-substrate interface**

Sarita Wisbeck,<sup>a§</sup> Andrea Luigi Sorrentino,<sup>b§</sup> Francielli S. Santana,<sup>a</sup> Luana C. de Camargo,<sup>a</sup>  
Ronny R. Ribeiro,<sup>a</sup> Enrico Salvadori,<sup>c</sup> Mario Chiesa,<sup>c</sup> Niccolò Giaconi,<sup>b</sup> Andrea Caneschi,<sup>d</sup> Matteo Mannini,<sup>b</sup>  
Lorenzo Poggini,<sup>e</sup> Matteo Briganti,<sup>b\*</sup> Giulia Serrano,<sup>d\*</sup> Jaísa F. Soares,<sup>a\*</sup> Roberta Sessoli<sup>b,e\*</sup>

### **Electronically Supplementary Information**

---

<sup>a</sup> Department of Chemistry, Federal University of Paraná, Centro Politécnico, Jardim das Américas, 81530-900 Curitiba-PR, Brazil

<sup>b</sup> Department of Chemistry "U. Schiff" (DICUS) and INSTM UdR Firenze, University of Florence, Via della Lastruccia 3-13, 50019 Sesto Fiorentino, Italy

<sup>c</sup> Department of Chemistry, University of Turin, Via Giuria 7, 10125 Torino, Italy

<sup>d</sup> Department of Industrial Engineering (DIEF) and INSTM Research Unit, University of Florence, Florence, Italy

<sup>e</sup> Institute for Chemistry of OrganoMetallic Compounds (ICCOM-CNR), Via Madonna del Piano, 50019 Sesto Fiorentino, Italy

---

e-mail: roberta.sessoli@unifi.it; jaísa.soares@ufpr.br; giulia.serrano@unifi.it; matteo.briganti@unifi.it

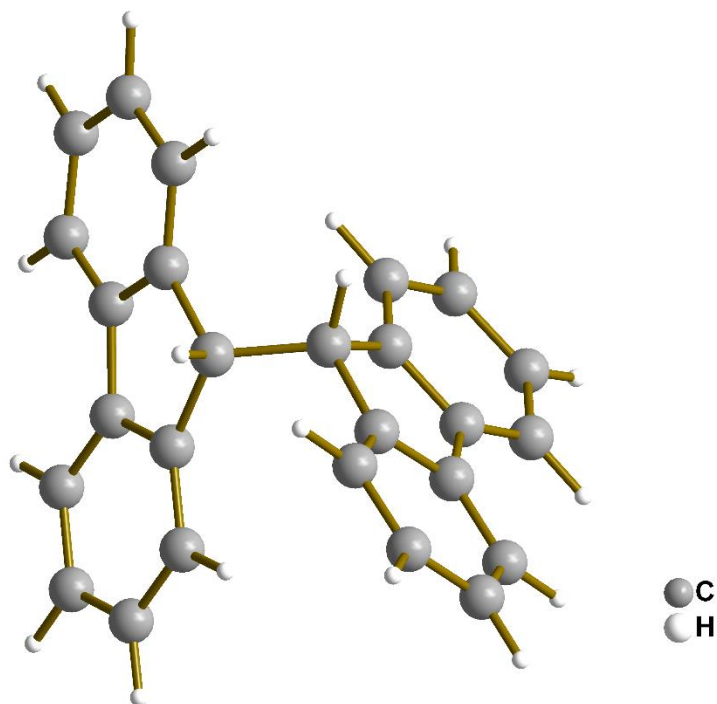

**Figure S1.** Representation of the molecular structure of 9,9'-bifluorenyl.

This dimer had been obtained upon oxidation of  $\text{Flu}^-$  (fluorenyl) by organic electron acceptors,<sup>1,2</sup> transition metal halide radical coupling,<sup>3,4</sup> or reductive coupling of 9-bromofluorene.<sup>5</sup> In our work, colorless crystals of 9,9'-bifluorenyl were isolated from the reaction mixture when fluorenyl lithium, LiFlu, was mixed with a suspension of  $[\text{TiCl}_4(\text{thf})_2]$  (thf = tetrahydrofuran) in toluene before the addition of cyclooctatetraene and excess of n-butyllithium ( $\text{LiBu}^n$ ). In this case, the titanium(IV) precursor oxidized  $\text{Flu}^-$  and led to unwanted dimerization with the concomitant reduction of titanium(IV) to titanium(III). The identity of the colorless product (9,9'-bifluorenyl) was verified by single-crystal X-ray diffraction analysis. This redox reaction prevented the formation of  $[\text{FluTi}(\text{cot})]$ , which was only obtained in reasonable yield after the order of addition was changed to allow a prior reaction of  $[\text{TiCl}_4(\text{thf})_2]$  with  $\text{Li}_2(\text{cot})$  and one additional equivalent of LiBu, before the addition of LiFlu, as described in the Experimental (main text).

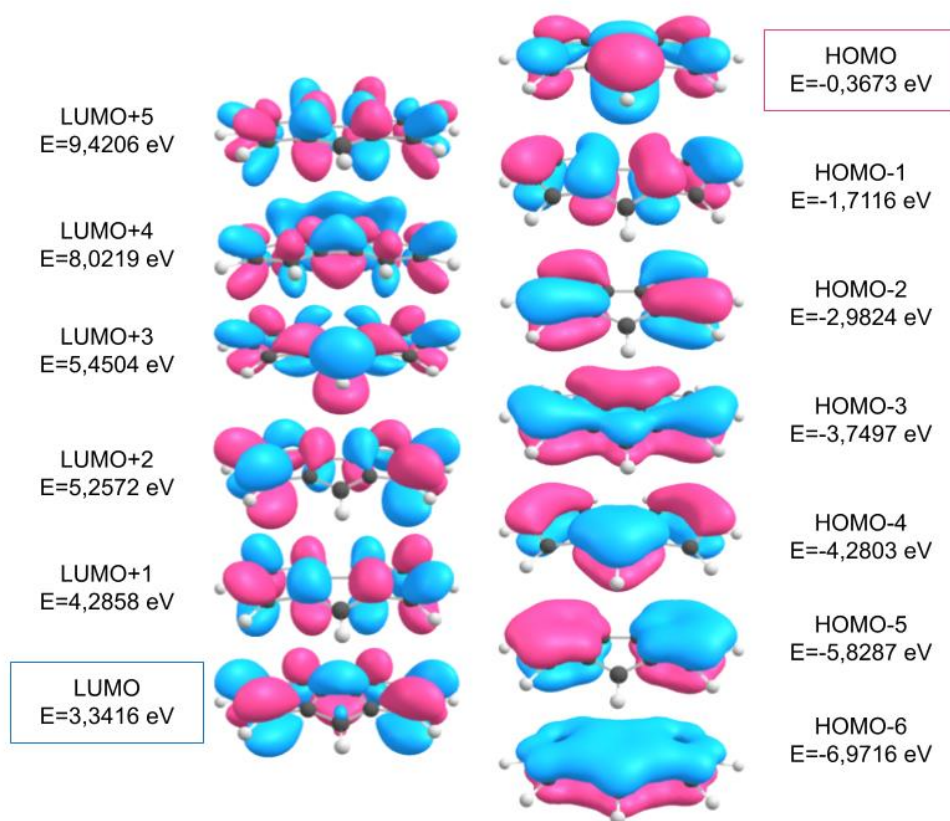

**Figure S2:** Energies and contour surfaces (30%) of the frontier molecular orbitals in  $\text{Flu}^-$ . The atomic coordinates were optimized in the vacuum, starting from the atomic coordinates of the fluorenyl ligand in the crystal structure of  $[\text{FluTi}(\text{cot})]$ .

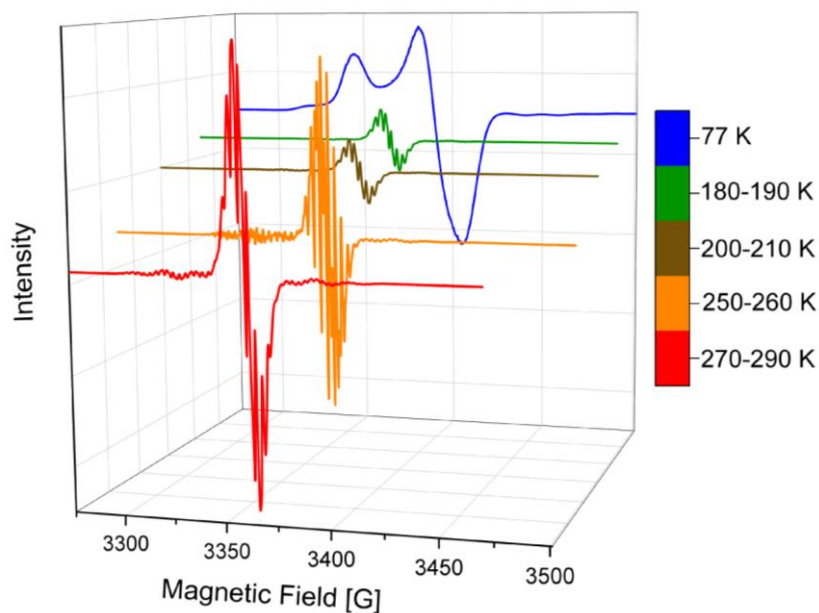

**Figure S3.** Selected X-band, CW-EPR spectra of [FluTi(cot)] recorded during slow thawing of a 1.0 mmol L<sup>-1</sup> solution of [FluTi(cot)] in toluene.

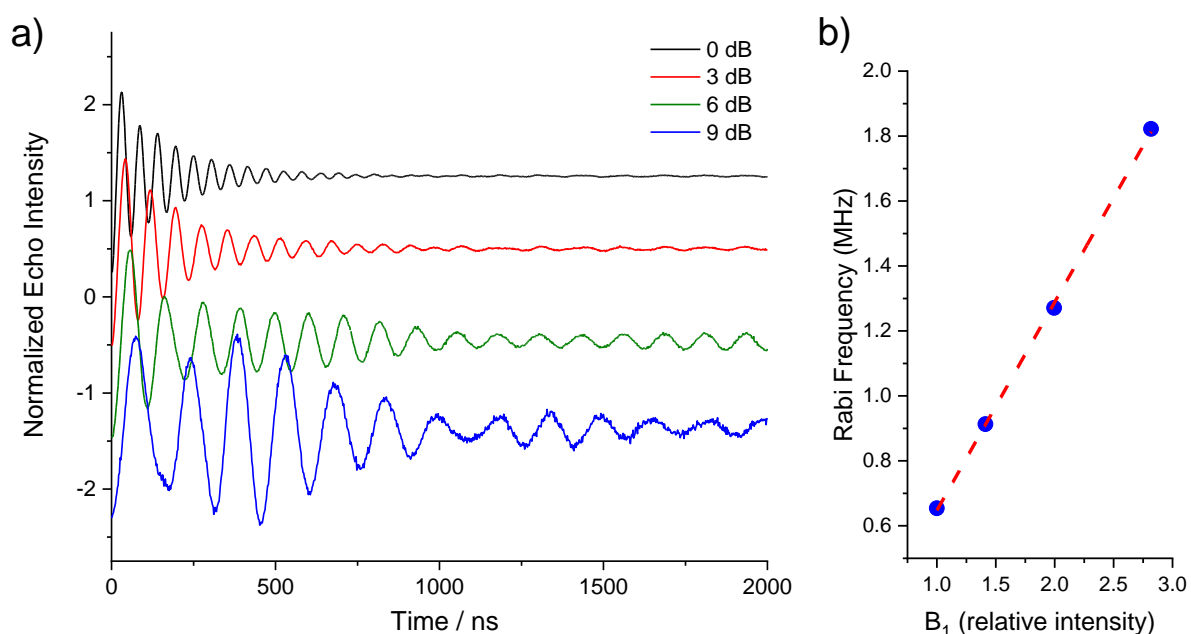

**Figure S4.** Nutation experiments performed on a 0.5 mmol L<sup>-1</sup> solution of [FluTi(cot)] in toluene-*d*<sub>8</sub> at  $T = 15$  K and Q-band frequency for four attenuations; a) Normalized echo intensity; b) Extracted Rabi frequency (blue dots) as a function of the intensity of the microwave radiation, well reproduced by assuming linear dependence (red line).

**Table S1.** Crystal and structure refinement data for  $[(\eta^8\text{-C}_8\text{H}_8)\text{Ti}(\eta^5\text{-C}_{13}\text{H}_9)]$ , [FluTi(cot)] (data collection carried out at two different temperatures, 100(2) and 296(2) K).

|                                                   |                                                                                                       |                                                                                                        |
|---------------------------------------------------|-------------------------------------------------------------------------------------------------------|--------------------------------------------------------------------------------------------------------|
| Elemental formula                                 | C21 H17 Ti                                                                                            | C21 H17 Ti                                                                                             |
| Formula weight                                    | 317.24                                                                                                | 317.24                                                                                                 |
| CCDC deposition number                            | 2355169                                                                                               | 2355167                                                                                                |
| Temperature of data collection                    | 100(2) K                                                                                              | 296(2) K                                                                                               |
| Wavelength                                        | 0.71073 Å                                                                                             | 0.71073 Å                                                                                              |
| Crystal system, space group                       | Orthorhombic, <i>Pnma</i>                                                                             | Orthorhombic, <i>Pnma</i>                                                                              |
| Unit cell dimensions                              | $a = 8.3693(5)$ Å<br>$b = 15.9237(8)$ Å<br>$c = 11.3545(6)$ Å<br>$\alpha = \beta = \gamma = 90^\circ$ | $a = 8.5539(5)$ Å<br>$b = 15.9444(10)$ Å<br>$c = 11.4097(6)$ Å<br>$\alpha = \beta = \gamma = 90^\circ$ |
| Volume                                            | $1513.22(14)$ Å <sup>3</sup>                                                                          | $1556.13(16)$ Å <sup>3</sup>                                                                           |
| Z, Calculated density                             | 4, 1.393 Mg/m <sup>3</sup>                                                                            | 4, 1.354 Mg/m <sup>3</sup>                                                                             |
| F(000)                                            | 660                                                                                                   | 660                                                                                                    |
| Absorption coefficient                            | 0.558 mm <sup>-1</sup>                                                                                | 0.543 mm <sup>-1</sup>                                                                                 |
| Crystal color, shape                              | violet, rhomb                                                                                         | violet, rhomb                                                                                          |
| Crystal size                                      | 0.465 x 0.274 x 0.160 mm                                                                              | 0.319 x 0.241 x 0.104 mm                                                                               |
| Theta range for data collection                   | 2.2 to 27.5 °                                                                                         | 3.0 to 27.0 °                                                                                          |
| Limiting indices                                  | $-10 \leq h \leq 10$ , $-20 \leq k \leq 20$ , $-14 \leq l \leq 14$                                    | $-11 \leq h \leq 11$ , $-20 \leq k \leq 20$ , $-14 \leq l \leq 14$                                     |
| Completeness to $\theta = 25.2^\circ$             | 99.7 %                                                                                                | 99.7 %                                                                                                 |
| Absorption correction                             | Semi-empirical from equivalents                                                                       | Semi-empirical from equivalents                                                                        |
| Max. and min. transmission                        | 0.7456 and 0.7069                                                                                     | 0.7456 and 0.7010                                                                                      |
| Reflections collected / unique                    | 33264 / 1805 [ $R_{\text{int}} = 0.029$ ]                                                             | 59572 / 1856 [ $R_{\text{int}} = 0.051$ ]                                                              |
| No. of 'observed' reflections ( $I > 2\sigma_I$ ) | 1679                                                                                                  | 1576                                                                                                   |
| Data / restraints / parameters                    | 1805 / 0 / 144                                                                                        | 1856 / 9 / 143                                                                                         |
| Goodness-of-fit on $F^2$                          | 1.048                                                                                                 | 1.073                                                                                                  |
| Final R indices ('observed' data)                 | $R_1 = 0.029$ , $wR_2 = 0.070$ <sup>(1)</sup>                                                         | $R_1 = 0.039$ , $wR_2 = 0.093$ <sup>(2)</sup>                                                          |
| Final R indices (all data)                        | $R_1 = 0.032$ , $wR_2 = 0.071$ <sup>(1)</sup>                                                         | $R_1 = 0.051$ , $wR_2 = 0.101$ <sup>(2)</sup>                                                          |
| Extinction coefficient                            | 0.0096(14)                                                                                            | n/a                                                                                                    |
| Largest difference between peak and hole          | 0.85 and $-0.48$ e Å <sup>-3</sup>                                                                    | 0.27 and $-0.43$ e Å <sup>-3</sup>                                                                     |
| Location of largest difference peak               | 0.80 Å from the Ti atom                                                                               | 0.63 Å from the C2 atom                                                                                |

<sup>(1)</sup> Reflections weighted  $w = [\sigma^2(F_o^2) + (0.0276P)^2 + 1.3633 * P]^{-1}$ , where  $P = (F_o^2 + 2F_c^2) / 3$

<sup>(2)</sup> Reflections weighted  $w = [\sigma^2(F_o^2) + (0.0412P)^2 + 0.9777 * P]^{-1}$ , where  $P = (F_o^2 + 2F_c^2) / 3$ .

**Table S2:** Molecular dimensions involving the Ti atom. Bond lengths are in Å, and angles in degrees (data collection at 100(2) K).

|                                       |            |                                      |            |
|---------------------------------------|------------|--------------------------------------|------------|
| Ti-C1                                 | 2.3413(18) | Ti-C2                                | 2.3836(12) |
| Ti-C2 <sup>i</sup>                    | 2.3836(12) | Ti-C7                                | 2.4008(12) |
| Ti-C8                                 | 2.301(2)   | Ti-C9                                | 2.3098(15) |
| Ti-C9 <sup>i</sup>                    | 2.3098(15) | Ti-C10                               | 2.3141(15) |
| Ti-C10 <sup>i</sup>                   | 2.3140(15) | Ti-C11                               | 2.3187(15) |
| Ti-C11 <sup>i</sup>                   | 2.3187(15) | Ti-C12                               | 2.323(2)   |
| C1-Ti-C2                              | 35.11(4)   | C1-Ti-C2 <sup>i</sup>                | 35.11(4)   |
| C2-Ti-C2 <sup>i</sup>                 | 57.53(6)   | C1-Ti-C7                             | 59.05(5)   |
| C2-Ti-C7                              | 35.03(4)   | C2 <sup>i</sup> -Ti-C7               | 58.12(4)   |
| C8-Ti-C1                              | 95.79(7)   | C8-Ti-C2                             | 113.32(6)  |
| C8-Ti-C2 <sup>i</sup>                 | 113.32(6)  | C8-Ti-C7                             | 148.26(6)  |
| C8-Ti-C9                              | 35.35(5)   | C8-Ti-C9 <sup>i</sup>                | 35.35(5)   |
| C8-Ti-C10                             | 68.11(6)   | C8-Ti-C10 <sup>i</sup>               | 68.11(6)   |
| C8-Ti-C11                             | 93.99(6)   | C8-Ti-C11 <sup>i</sup>               | 93.99(6)   |
| C8-Ti-C12                             | 104.57(8)  | C9-Ti-C1                             | 103.17(6)  |
| C9 <sup>i</sup> -Ti-C1                | 103.17(6)  | C9-Ti-C2                             | 134.97(6)  |
| C9 <sup>i</sup> -Ti-C2                | 99.67(5)   | C9-Ti-C2 <sup>i</sup>                | 99.67(5)   |
| C9 <sup>i</sup> -Ti-C2 <sup>i</sup>   | 134.97(6)  | C9-Ti-C7                             | 157.79(5)  |
| C9 <sup>i</sup> -Ti-C7                | 125.99(6)  | C9-Ti-C9 <sup>i</sup>                | 68.07(10)  |
| C9-Ti-C10                             | 35.25(7)   | C9-Ti-C10 <sup>i</sup>               | 93.72(7)   |
| C9 <sup>i</sup> -Ti-C10 <sup>i</sup>  | 35.25(7)   | C9 <sup>i</sup> -Ti-C10              | 93.72(6)   |
| C9-Ti-C11                             | 67.92(7)   | C9-Ti-C11 <sup>i</sup>               | 104.31(6)  |
| C9 <sup>i</sup> -Ti-C11               | 104.30(6)  | C9 <sup>i</sup> -Ti-C11 <sup>i</sup> | 67.92(7)   |
| C9-Ti-C12                             | 93.64(6)   | C9 <sup>i</sup> -Ti-C12              | 93.64(6)   |
| C10-Ti-C1                             | 121.72(5)  | C10 <sup>i</sup> -Ti-C1              | 121.72(5)  |
| C10-Ti-C2                             | 155.55(5)  | C10 <sup>i</sup> -Ti-C2              | 98.76(5)   |
| C10-Ti-C2 <sup>i</sup>                | 98.76(5)   | C10 <sup>i</sup> -Ti-C2 <sup>i</sup> | 155.55(5)  |
| C10-Ti-C7                             | 140.02(5)  | C10 <sup>i</sup> -Ti-C7              | 106.89(5)  |
| C10 <sup>i</sup> -Ti-C10              | 103.92(8)  | C10-Ti-C11                           | 35.05(7)   |
| C10-Ti-C11 <sup>i</sup>               | 93.33(6)   | C10 <sup>i</sup> -Ti-C11             | 93.33(6)   |
| C10 <sup>i</sup> -Ti-C11 <sup>i</sup> | 35.05(7)   | C10-Ti-C12                           | 67.60(6)   |
| C10 <sup>i</sup> -Ti-C12              | 67.59(6)   | C11-Ti-C1                            | 144.75(5)  |
| C11 <sup>i</sup> -Ti-C1               | 144.75(5)  | C11-Ti-C2                            | 152.60(5)  |
| C11-Ti-C2 <sup>i</sup>                | 110.62(5)  | C11 <sup>i</sup> -Ti-C2              | 110.62(5)  |
| C11 <sup>i</sup> -Ti-C2 <sup>i</sup>  | 152.60(5)  | C11-Ti-C7                            | 117.74(5)  |
| C11 <sup>i</sup> -Ti-C7               | 97.42(5)   | C11 <sup>i</sup> -Ti-C11             | 67.64(10)  |
| C11-Ti-C12                            | 35.04(5)   | C11 <sup>i</sup> -Ti-C12             | 35.04(5)   |
| C12-Ti-C1                             | 159.65(7)  | C12-Ti-C2                            | 131.11(5)  |
| C12-Ti-C2 <sup>i</sup>                | 131.11(5)  | C12-Ti-C7                            | 101.71(6)  |
| C2-C1-Ti                              | 74.07(9)   | C2 <sup>i</sup> -C1-Ti               | 74.07(9)   |
| C2-C7-Ti                              | 71.83(7)   | C3-C2-Ti                             | 119.91(9)  |
| C6-C7-Ti                              | 121.53(9)  | C7-C2-Ti                             | 73.14(7)   |
| C7 <sup>i</sup> -C7-Ti                | 72.42(3)   | C8-C9-Ti                             | 72.00(10)  |
| C9-C8-Ti                              | 72.66(10)  | C9 <sup>i</sup> -C8-Ti               | 72.66(10)  |
| C9-C10-Ti                             | 72.21(9)   | C10-C9-Ti                            | 72.54(9)   |
| C10-C11-Ti                            | 72.29(9)   | C11-C10-Ti                           | 72.66(9)   |
| C11-C12-Ti                            | 72.33(10)  | C11 <sup>i</sup> -C12-Ti             | 72.33(10)  |
| C12-C11-Ti                            | 72.63(10)  | Ti-C1-H1                             | 121.5(15)  |
| Ti-C8-H8                              | 129.8(18)  | Ti-C9-H9                             | 129.3(15)  |
| Ti-C10-H10                            | 129.7(14)  | Ti-C11-H11                           | 131.9(13)  |
| Ti-C12-H12                            | 132.1(19)  |                                      |            |

Symmetry transformations used to generate equivalent atoms: (i) x, -y+1/2, z.

**Table S3:** Molecular dimensions involving the Ti atom. Bond lengths are in Å, angles in degrees (data collection at 296(2) K).

|                                       |            |                                      |            |
|---------------------------------------|------------|--------------------------------------|------------|
| Ti-C1                                 | 2.343(3)   | Ti-C2                                | 2.3865(18) |
| Ti-C2 <sup>i</sup>                    | 2.3865(18) | Ti-C7 <sup>i</sup>                   | 2.4005(17) |
| Ti-C8                                 | 2.274(4)   | Ti-C9                                | 2.276(3)   |
| Ti-C9 <sup>i</sup>                    | 2.276(3)   | Ti-C10                               | 2.284(3)   |
| Ti-C10 <sup>i</sup>                   | 2.284(3)   | Ti-C11                               | 2.289(3)   |
| Ti-C11 <sup>i</sup>                   | 2.289(3)   | Ti-C12                               | 2.286(4)   |
| C1-Ti-C2                              | 34.99(6)   | C1-Ti-C2 <sup>i</sup>                | 34.99(6)   |
| C2-Ti-C2 <sup>i</sup>                 | 57.48(10)  | C1-Ti-C7 <sup>i</sup>                | 58.59(8)   |
| C2 <sup>i</sup> -Ti-C7 <sup>i</sup>   | 34.84(6)   | C2-Ti-C7 <sup>i</sup>                | 57.83(6)   |
| C8-Ti-C1                              | 97.68(14)  | C8-Ti-C2                             | 114.78(11) |
| C8-Ti-C2 <sup>i</sup>                 | 114.78(11) | C8-Ti-C7 <sup>i</sup>                | 149.49(11) |
| C8-Ti-C9                              | 35.24(18)  | C8-Ti-C9 <sup>i</sup>                | 35.24(18)  |
| C8-Ti-C10                             | 67.67(18)  | C8-Ti-C10 <sup>i</sup>               | 67.67(18)  |
| C8-Ti-C11                             | 92.74(15)  | C8-Ti-C11 <sup>i</sup>               | 92.74(15)  |
| C8-Ti-C12                             | 102.74(16) | C9-Ti-C1                             | 104.82(12) |
| C9 <sup>i</sup> -Ti-C1                | 104.82(12) | C9-Ti-C2                             | 136.42(14) |
| C9 <sup>i</sup> -Ti-C2                | 100.84(11) | C9-Ti-C2 <sup>i</sup>                | 100.84(11) |
| C9 <sup>i</sup> -Ti-C2 <sup>i</sup>   | 136.42(14) | C9 <sup>i</sup> -Ti-C7 <sup>i</sup>  | 158.67(11) |
| C9-Ti-C7 <sup>i</sup>                 | 126.65(14) | C9-Ti-C9 <sup>i</sup>                | 67.8(3)    |
| C9-Ti-C10                             | 35.04(19)  | C9-Ti-C10 <sup>i</sup>               | 92.9(2)    |
| C9 <sup>i</sup> -Ti-C10 <sup>i</sup>  | 35.04(19)  | C9 <sup>i</sup> -Ti-C10              | 92.9(2)    |
| C9-Ti-C11                             | 67.1(2)    | C9-Ti-C11 <sup>i</sup>               | 102.63(11) |
| C9 <sup>i</sup> -Ti-C11               | 102.63(11) | C9 <sup>i</sup> -Ti-C11 <sup>i</sup> | 67.1(2)    |
| C9-Ti-C12                             | 92.05(15)  | C9 <sup>i</sup> -Ti-C12              | 92.05(15)  |
| C10-Ti-C1                             | 122.99(14) | C10 <sup>i</sup> -Ti-C1              | 122.99(14) |
| C10-Ti-C2                             | 156.59(12) | C10 <sup>i</sup> -Ti-C2              | 99.69(10)  |
| C10-Ti-C2 <sup>i</sup>                | 99.69(10)  | C10 <sup>i</sup> -Ti-C2 <sup>i</sup> | 156.59(12) |
| C10 <sup>i</sup> -Ti-C7 <sup>i</sup>  | 139.92(16) | C10-Ti-C7 <sup>i</sup>               | 107.32(13) |
| C10 <sup>i</sup> -Ti-C10              | 102.40(17) | C10-Ti-C11                           | 34.59(19)  |
| C10-Ti-C11 <sup>i</sup>               | 91.4(2)    | C10 <sup>i</sup> -Ti-C11             | 91.4(2)    |
| C10 <sup>i</sup> -Ti-C11 <sup>i</sup> | 34.59(19)  | C10-Ti-C12                           | 66.28(18)  |
| C10 <sup>i</sup> -Ti-C12              | 66.28(18)  | C11-Ti-C1                            | 145.46(13) |
| C11 <sup>i</sup> -Ti-C1               | 145.46(13) | C11-Ti-C2                            | 152.46(12) |
| C11-Ti-C2 <sup>i</sup>                | 111.31(12) | C11 <sup>i</sup> -Ti-C2              | 111.31(12) |
| C11 <sup>i</sup> -Ti-C2 <sup>i</sup>  | 152.46(12) | C11 <sup>i</sup> -Ti-C7 <sup>i</sup> | 117.71(13) |
| C11-Ti-C7 <sup>i</sup>                | 97.98(9)   | C11 <sup>i</sup> -Ti-C11             | 65.9(3)    |
| C11-Ti-C12                            | 34.15(17)  | C11 <sup>i</sup> -Ti-C12             | 34.15(17)  |
| C12-Ti-C1                             | 159.58(13) | C12-Ti-C2                            | 131.21(9)  |
| C12-Ti-C2 <sup>i</sup>                | 131.21(9)  | C12-Ti-C7 <sup>i</sup>               | 102.10(11) |
| C2-C1-Ti                              | 74.20(13)  | C2 <sup>i</sup> -C1-Ti               | 74.20(13)  |
| C2-C7-Ti                              | 72.05(10)  | C3-C2-Ti                             | 120.05(14) |
| C6-C7-Ti                              | 121.05(13) | C7-C2-Ti                             | 73.11(10)  |
| C7 <sup>i</sup> -C7-Ti                | 72.55(5)   | C8-C9-Ti                             | 72.3(2)    |
| C9-C8-Ti                              | 72.5(2)    | C9 <sup>i</sup> -C8-Ti               | 72.5(2)    |
| C9-C10-Ti                             | 72.18(19)  | C10-C9-Ti                            | 72.78(19)  |
| C10-C11-Ti                            | 72.5(2)    | C11-C10-Ti                           | 72.9(2)    |
| C11-C12-Ti                            | 73.1(2)    | C11 <sup>i</sup> -C12-Ti             | 73.1(2)    |
| C12-C11-Ti                            | 72.8(2)    | Ti-C1-H1                             | 123(2)     |
| Ti-C8-H8                              | 130(3)     | Ti-C9-H9                             | 124(3)     |
| Ti-C10-H10                            | 129(3)     | Ti-C11-H11                           | 128(3)     |
| Ti-C12-H12                            | 132(3)     |                                      |            |

Symmetry transformations used to generate equivalent atoms: (i) x, -y+1/2, z.

**Table S4.** Computed hyperfine coupling tensors of Ti and all the hydrogen atoms within DFT/B2PLYP approach. The hydrogen's label is the same as shown in Figure 1.

| Atom        | A(iso)  | A <sub>x</sub> | A <sub>y</sub> | A <sub>z</sub> |
|-------------|---------|----------------|----------------|----------------|
| Ti (I = 47) | 39.1258 | 58.17          | 55.16          | 4.05           |
| H1 (Flu)    | 4.1961  | 9.55           | 1.72           | 1.32           |
| H3 (Flu)    | 0.4457  | -0.77          | 3.11           | -1.00          |
| H4 (Flu)    | -0.6399 | -1.59          | 0.90           | -1.23          |
| H5 (Flu)    | 0.2188  | -0.34          | 1.49           | -0.49          |
| H6 (Flu)    | -0.4964 | 2.20           | -1.94          | -1.76          |
| H3' (Flu)   | 0.4454  | -0.77          | 3.11           | -1.01          |
| H4' (Flu)   | -0.6400 | -1.59          | 0.90           | -1.23          |
| H5' (Flu)   | 0.2189  | -0.34          | 1.49           | -0.49          |
| H6' (Flu)   | -0.4961 | 2.21           | -1.94          | -1.76          |
| H8 (cot)    | 8.5093  | 13.32          | 6.77           | 5.45           |
| H9 (cot)    | 8.2419  | 6.44           | 13.10          | 5.19           |
| H10 (cot)   | 7.2943  | 5.44           | 12.17          | 4.27           |
| H11 (cot)   | 6.8693  | 11.68          | 5.04           | 3.89           |
| H12 (cot)   | 7.0014  | 11.71          | 5.28           | 4.02           |
| H9' (cot)   | 8.2424  | 6.44           | 13.10          | 5.19           |
| H10' (cot)  | 7.2940  | 5.44           | 12.17          | 4.27           |
| H11' (cot)  | 6.8691  | 11.68          | 5.04           | 3.89           |

#### Estimation of the nuclear spin contribution to $T_m$

The coherence times at the single molecule level were estimated employing the computed values of the hyperfine coupling constants. The hydrogen nuclei contributions to the coherence time were computed according to previous works.<sup>6-8</sup> Within this approach,  $T_m = \hbar\Delta/(E_n)^2$ , where  $E_n$  is the nuclear contribution to the echo linewidth, and  $\Delta$  is the value of the gap between the two qubit states (33.3 GHz here).  $E_n$  can be computed with the formula:

$$E_n^2 = \sum_k \frac{(\omega_k^{\parallel})^2 I_k(I_k + 1)}{3}$$

where  $\omega_k$  is the difference between the interaction energies of the electronic spin with the  $k^{\text{th}}$  active nuclear spin when the electronic spin is in two different states.



**Table S5.** Computed vibrational spectrum in the vacuum and in implicit solvent.

| <b>Vacuum</b> |                                    | <b>Implicit solvent (hexane)</b> |                                    |
|---------------|------------------------------------|----------------------------------|------------------------------------|
| <b>Number</b> | <b>Frequency (cm<sup>-1</sup>)</b> | <b>Number</b>                    | <b>Frequency (cm<sup>-1</sup>)</b> |
| 6             | 31.74                              | 6                                | 31.52                              |
| 7             | 87.15                              | 7                                | 83.15                              |
| 8             | 90.17                              | 8                                | 84.74                              |
| 9             | 102.06                             | 9                                | 101.40                             |
| 10            | 129.36                             | 10                               | 129.60                             |
| 11            | 130.88                             | 11                               | 130.13                             |
| 12            | 156.01                             | 12                               | 154.88                             |
| 13            | 219.83                             | 13                               | 219.26                             |
| 14            | 220.36                             | 14                               | 220.55                             |
| 15            | 236.44                             | 15                               | 234.05                             |
| 16            | 245.29                             | 16                               | 241.27                             |
| 17            | 308.65                             | 17                               | 309.30                             |
| 18            | 333.94                             | 18                               | 333.63                             |
| 19            | 362.44                             | 19                               | 361.48                             |
| 20            | 368.99                             | 20                               | 368.60                             |
| 21            | 392.39                             | 21                               | 391.85                             |
| 22            | 400.29                             | 22                               | 399.85                             |
| 23            | 400.43                             | 23                               | 400.08                             |
| 24            | 433.25                             | 24                               | 432.74                             |
| 25            | 458.17                             | 25                               | 456.85                             |
| 26            | 481.46                             | 26                               | 482.26                             |

**Table S6.** Pictorial representation of the computed normal modes in the vacuum. The frequencies' character is classified within approximate  $C_s$  point group symmetry.

| Frequency | Character     | Composition                                                                          |
|-----------|---------------|--------------------------------------------------------------------------------------|
| 31.74     | antisymmetric | 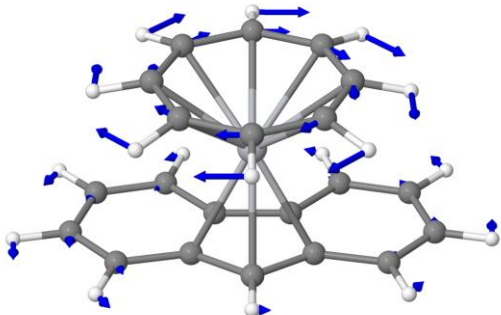   |
| 87.15     | antisymmetric |   |
| 90.17     | symmetric     |  |

Table S6 (continuation).

| Frequency | Character     | Composition                                                                          |
|-----------|---------------|--------------------------------------------------------------------------------------|
| 102.06    | symmetric     | 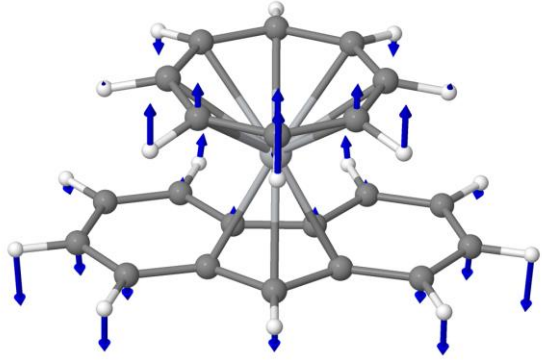   |
| 129.36    | symmetric     |   |
| 130.88    | antisymmetric |  |

**Table S7.** *Lying*<sub>1</sub> configuration: Mulliken Spin density for 'Top' and 'Bridge' sites and for different U values combined with revPBE functional.

| U value | Adsorption site                                                                   |                                                                                     |
|---------|-----------------------------------------------------------------------------------|-------------------------------------------------------------------------------------|
|         | Bridge                                                                            | Top                                                                                 |
| 2.2 eV  | 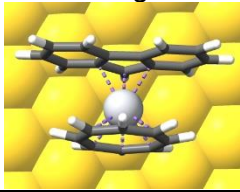 |  |
| 3.0 eV  | 0.07712                                                                           | 0.017035                                                                            |
|         | 0.040916                                                                          | -0.010603                                                                           |

**Table S8.** Adsorption energies of the four examined configurations computed with three different density functionals.

| Orientation                    | Adsorption Energy (kcal/mol) |              |        |
|--------------------------------|------------------------------|--------------|--------|
|                                | Density Functional           |              |        |
|                                | Revised PBE                  | Original PBE | TPSS   |
| <i>Standing</i> <sub>Flu</sub> | -32.13                       | -48.70       | -48.20 |
| <i>Standing</i> <sub>cot</sub> | -24.75                       | -36.83       | -37.21 |
| <i>Lying</i> <sub>1</sub>      | -24.44                       | -36.32       | -28.52 |
| <i>Lying</i> <sub>2</sub>      | -23.87                       | -35.51       | -27.93 |

## References

- 1 R. D. Guthrie, D. P. Wesley, G. W. Pendygraft and A. T. Young, *J. Am. Chem. Soc.*, 1976, **98**, 5870-5877.
- 2 R. D. Guthrie, C. Hartmann, R. Neill and D. E. Nutter, *The Journal of Organic Chemistry*, 1987, **52**, 736-740.
- 3 S. Y. Knjazhanski, G. Moreno, G. Cadenas, V. K. Belsky and B. M. Bulychev, *Tetrahedron*, 1999, **55**, 1639-1646.
- 4 M. H. Al-Afyouni, T. A. Huang, F. Hung-Low and C. A. Bradley, *Tetrahedron Lett.*, 2011, **52**, 3261-3265.
- 5 V. S. Sridevi, W. K. Leong and Y. Zhu, *Organometallics*, 2006, **25**, 283-288.
- 6 P. C. E. Stamp and I. S. Tupitsyn, *Chem. Phys.*, 2004, **296**, 281-293.
- 7 M. Warner, S. Din, I. S. Tupitsyn, G. W. Morley, A. M. Stoneham, J. A. Gardener, Z. Wu, A. J. Fisher, S. Heutz, C. W. M. Kay and G. Aeppli, *Nature*, 2013, **503**, 504-508.
- 8 L. Escalera-Moreno, A. Gaita-Ariño and E. Coronado, *Phys. Rev. B*, 2019, **100**, 064405.
